# Supplementary material for: Notch signaling genes: Myogenic DNA hypomethylation and 5-hydroxymethylcytosine
Source: PubMed Central journal article supplement — Epigenetics. 2014 Mar 26;9(6):842–50. doi: 10.4161/epi.28597 (PMC4065182; doi:10.4161/epi.28597), 2014-03-26
Supplement: epi-9-842-s01.pdf [file epi-9-842-s01.pdf]

## **Supplemental Material to:**

**Jolyon Terragni, Guoqiang Zhang, Zhiyi Sun, Sriharsa Pradhan, Lingyun Song, Gregory E Crawford, Michelle Lacey, and Melanie Ehrlich**

**Notch signaling genes  
Myogenic DNA hypomethylation and  
5-hydroxymethylcytosine**

**Epigenetics 2014; 9(6)  
<http://dx.doi.org/10.4161/epi.28597>**

**[www.landesbioscience.com/journals/epigenetics/article/28597/](http://www.landesbioscience.com/journals/epigenetics/article/28597/)**

## **Notch Epigenetics: DNA hypomethylation and 5-hydroxymethylcytosine**

Jolyon Terragni, Guoqiang Zhang, Zhiyi Sun, Sriharsa Pradhan, Lingyun Song, Gregory E. Crawford,

Michelle Lacey, and Melanie Ehrlich

Terragni et al. Supplementary Material

Table S1 and S2

Figures S1 - S3

**Table S1. RNA-seq analysis of expression of some Notch signaling genes****A RNA-seq data for Mb and nonmuscle cell cultures at Notch signaling genes**

| Gene name | RNA isoform | Length | Mb   | HUVEC | NHEK | NHLF | LCL      |        |
|-----------|-------------|--------|------|-------|------|------|----------|--------|
|           |             |        | FPKM | FPKM  | FPKM | FPKM | GM 12878 | H1 ESC |
|           |             |        | FPKM | FPKM  | FPKM | FPKM | FPKM     | FPKM   |
| NOTCH1    | NM_017617   | 9371   | 6.2  | 30.4  | 35.9 | 6.5  | 8.2      | 14.2   |
| NOTCH2    | NM_024408   | 11389  | 48.8 | 22.0  | 29.6 | 41.7 | 2.8      | 15.2   |
| DLL1      | NM_005618   | 3906   | 3.3  | 0.6   | 2.2  | 0.3  | 0.1      | 0.7    |
| DLL3      | NM_016941   | 2380   | 0.1  | 0.3   | 0.1  | 0.1  | 0.3      | 1.2    |
| DLL3      | NM_203486   | 2043   | 0.7  | 0.9   | 1.0  | 0.2  | 0.6      | 3.8    |
| DLL4      | NM_019074   | 3380   | 0.1  | 3.0   | 0.1  | 0.6  | 0.2      | 0.2    |
| JAG1      | NM_000214   | 5901   | 6.5  | 18.0  | 44.2 | 8.4  | 2.6      | 9.4    |
| JAG2      | NM_145159   | 5720   | 2.6  | 6.7   | 8.9  | 0.0  | 0.0      | 0.1    |
| LFNG      | NM_002304   | 2058   | 0.7  | 0.0   | 0.0  | 0.0  | 0.0      | 0.0    |

<sup>1</sup> We determined the FPKM (Fragments Per Kilobase of transcript per Million mapped reads) from ENCODE data (<http://genome.ucsc.edu>; non-strand-specific RNA-seq, poly(A)<sup>+</sup> RNA, B. Wold, CalTech) using Cuffdiff as described in Methods. The observed transcripts were originally mapped to ENSEMBL transcripts, whose length are given. For comparison to (B), the closest RefSeq transcript is given. Mt are not yet publicly available in the ENCODE data base. *NOTCH3* and *NOTCH4* data are not given because they were unreliable.

**B RNA-seq data for comparison of Mb and Mt at Notch signaling genes<sup>1</sup>**

| Gene name         | RNA isoform  | Length | Mb4  | Mt4  | Mb13 | Mt13 |
|-------------------|--------------|--------|------|------|------|------|
| OBSCN (non-Notch) | NM_052843    | 20402  | 0.8  | 25.2 | 0.2  | 4.1  |
| OBSCN (non-Notch) | NM_001098623 | 24030  | 0.2  | 7.7  | 0.0  | 1.2  |
| NOTCH1            | NM_017617    | 9295   | 0.7  | 4.5  | 1.3  | 1.2  |
| NOTCH2            | NM_024408    | 11466  | 38.6 | 24.5 | 32.8 | 26.1 |
| NOTCH3            | NM_000435    | 8071   | 3.2  | 20.6 | 26.7 | 19.4 |
| NOTCH4            | NM_004557    | 6745   | 0.0  | 0.0  | 0.2  | 0.1  |
| DLL1              | NM_005618    | 3310   | 3.6  | 8.8  | 0.9  | 6.6  |
| DLL3              | NM_016941    | 2383   | 0.0  | 0.0  | 0.1  | 0.1  |
| DLL3              | NM_203486    | 2046   | 0.2  | 0.2  | 0.3  | 0.2  |
| DLL4              | NM_019074    | 3420   | 0.0  | 0.1  | 0.0  | 0.0  |
| JAG1              | NM_000214    | 5987   | 7.1  | 7.6  | 5.8  | 14.9 |
| JAG2              | NM_145159    | 4963   | 0.2  | 2.6  | 0.1  | 0.4  |
| JAG2              | NM_002226    | 5077   | 0.8  | 8.1  | 0.3  | 2.5  |
| LFNG              | NM_002304    | 2058   | 0.7  | 2.5  | 7.8  | 2.1  |

<sup>1</sup> We determined FPKM from previously unpublished RNA-seq data on poly(A)<sup>+</sup> RNA (Crawford/Ehrlich laboratories) using Cuffdiff. *OBSCN*, which encodes a structural protein of skeletal muscle, is included in the table to show the expected upregulation of its RNA from Mb to Mt. Observed transcripts were mapped to RefSeq transcripts.

**Table S2. Primers for quantification of 5hmC and 5mC at selected CCGG sites**

| <b>ID of studied CCGG site</b> | <b>Coordinates of CCGG site (hg19)</b> | <b>Gene subregion</b>       | <b>Forward primer for Epimark<sup>1</sup> 5hmC/5mC analysis</b> | <b>Reverse primer for Epimark 5hmC/5mC analysis</b> | <b>Size of amplicon for Epimark analysis (bp)</b> |
|--------------------------------|----------------------------------------|-----------------------------|-----------------------------------------------------------------|-----------------------------------------------------|---------------------------------------------------|
| NOTCH1-19938                   | chr9:139,419,938                       | <i>NOTCH1</i> intron 2      | TCTGAAGCAGAACATGCCAC                                            | TCCCTCTGTACATCCCATCTG                               | 115                                               |
| NOTCH1-ex20                    | chr9:139,402,737                       | <i>NOTCH1</i> exon 20       | ACAGCAGGTTACCTTGTCGC                                            | AACCTTGTCACCTGGTGTGA                                | 166                                               |
| NOTCH1-ex32                    | chr9:139,393,700                       | <i>NOTCH1</i> exon 32       | GGCTCACCCAGGTCATCTAC                                            | AGGCATCGGTGTACGTCTG                                 | 209                                               |
| NOTCH2-DMR                     | chr1:120,469,121                       | <i>NOTCH2</i> exon 24       | ATGGATTGGGAAGCTCACTG                                            | GACTTGTGCTGTGGCCAGTA                                | 294                                               |
| DLL1-93978                     | chr6:170,493,978                       | 97 kb dnstrm of <i>DLL1</i> | AGACAGGGTGCCCTTCGTCTA                                           | GGAGGAGGCGCTCATATTAC                                | 268                                               |
| DLL1-35577                     | chr6:170,535,577                       | 56 kb dnstrm of <i>DLL1</i> | TTCTCCAACCAGCCATTGT                                             | TGGATATTATGCTGCGCTGTG                               | 74                                                |
| JAG2-19503                     | chr14:105,619,503                      | <i>JAG2</i> intron 5        | GGAATGTCATCCAGGCCA                                              | AGCTGAACTGGGCTGATAGG                                | 139                                               |

<sup>1</sup> The Epimark kit from New England Biolabs, Ipswich, MA.

**Figure S1. The *NOTCH1* intron 2 region displays differential epigenetics in myoblasts (Mb), myotubes (Mt), and skeletal muscle vs. other samples.** a) Significantly hypomethylated (green) or hypermethylated (red) DMRs or individual DM sites in the skeletal muscle lineage. (b) Predicted chromatin structures of subregions<sup>1</sup>. (c) MyoD binding from C2C12 ChIP-seq<sup>2</sup> and identification of orthologous human sequences. Sites shown in blue overlapped the MyoD-like recognition sequences. (d) DNaseI-seq<sup>3</sup>. (e) RNA-seq data from the minus-strand; vertical viewing range, 1-to-30. (f) Examples of RRBS data. Chr9:139,417,716-139,422,160 is shown (hg19, <http://genome.ucsc.edu>). Heart muscle is shown but was not included in the statistical determination of myogenic hypomethylation. Overlapping epigenetic features mentioned in the main text are boxed. Pairs of samples labeled 1 and 2 are technical duplicates but the LCLs and skin fibroblasts are separately derived cell cultures. The other skeletal muscle sample is not included because for this gene it had too low RRBS signals. See legends to Figures 1 and 2 and Tsumagari et al.<sup>3</sup> for details about samples and tracks.

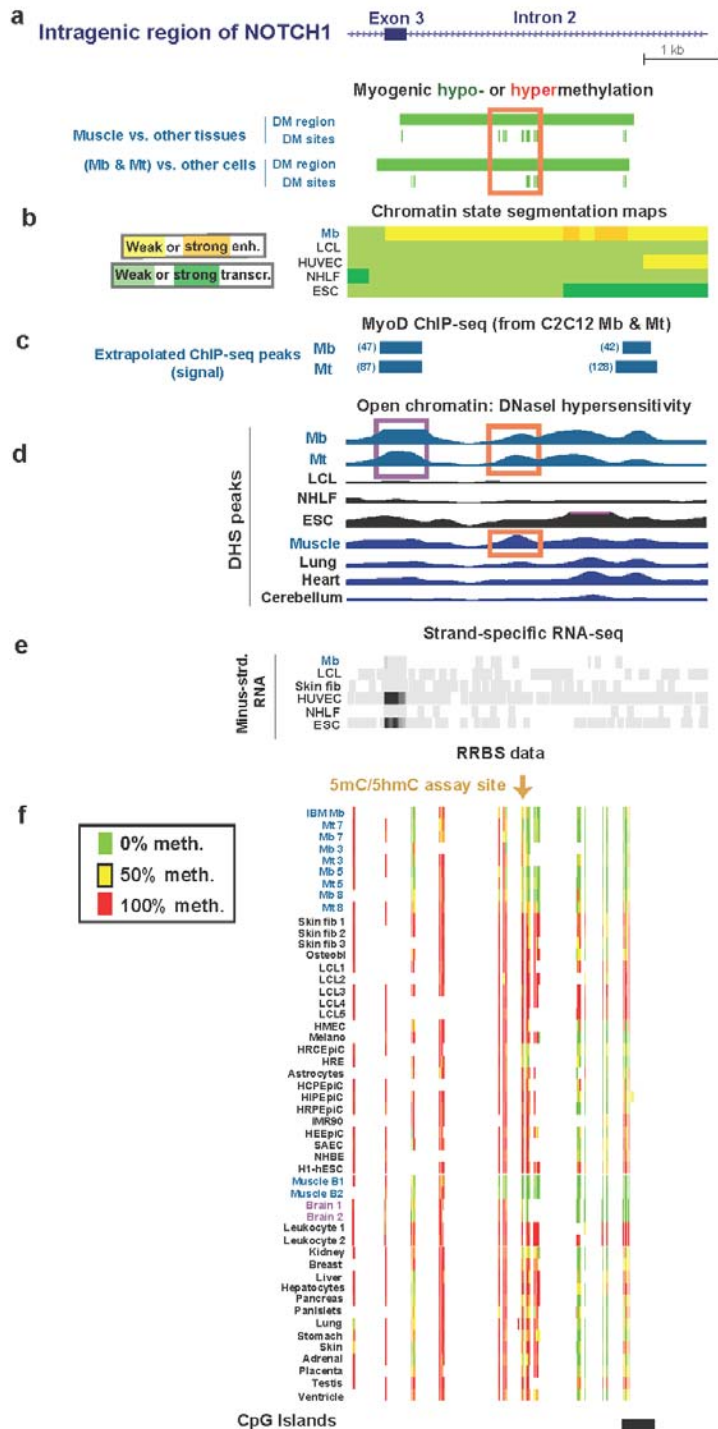

**Figure S2. Myogenic hypomethylated DMRs are present far upstream of *NOTCH1* as well as in the body of the gene.**

(a) Significant myogenic hypo- or hyper-methylated DMRs. (b). MyoD binding from C2C12 ChIP-seq as in Figure S1 except that only the signal strengths  $\geq 40$  are indicated. (c) RNA-seq data as in the main Figure 1 except that the vertical viewing range was 1-to-100. (d) Examples of RRBS data. The region shown is chr9:139,339,111-139,592,061. The thick orange boxes indicate DMRs that overlap DNaseI-hypersensitivity sites (DHS) and enhancer-type chromatin<sup>1</sup> in Mb and Mt but not in other tested cell types (left box) or in Mb and several other tested cell types (middle box; data not shown). The MbMt-hypomethylated DMR with a thin-lined orange box around it overlapped a Mb- and Mt-associated DHS but not enhancer-type chromatin in Mb or Mt. The black boxes in panel d indicate some regions with differential methylation that can be seen at this magnification. Upon zooming in, the hypomethylation of LCLs vs. other cell types can be seen at the intragenic *NOTCH1* MbMt-hypermethylated DMRs of all but one of the sites between *NOTCH1* and *EGFL7*.

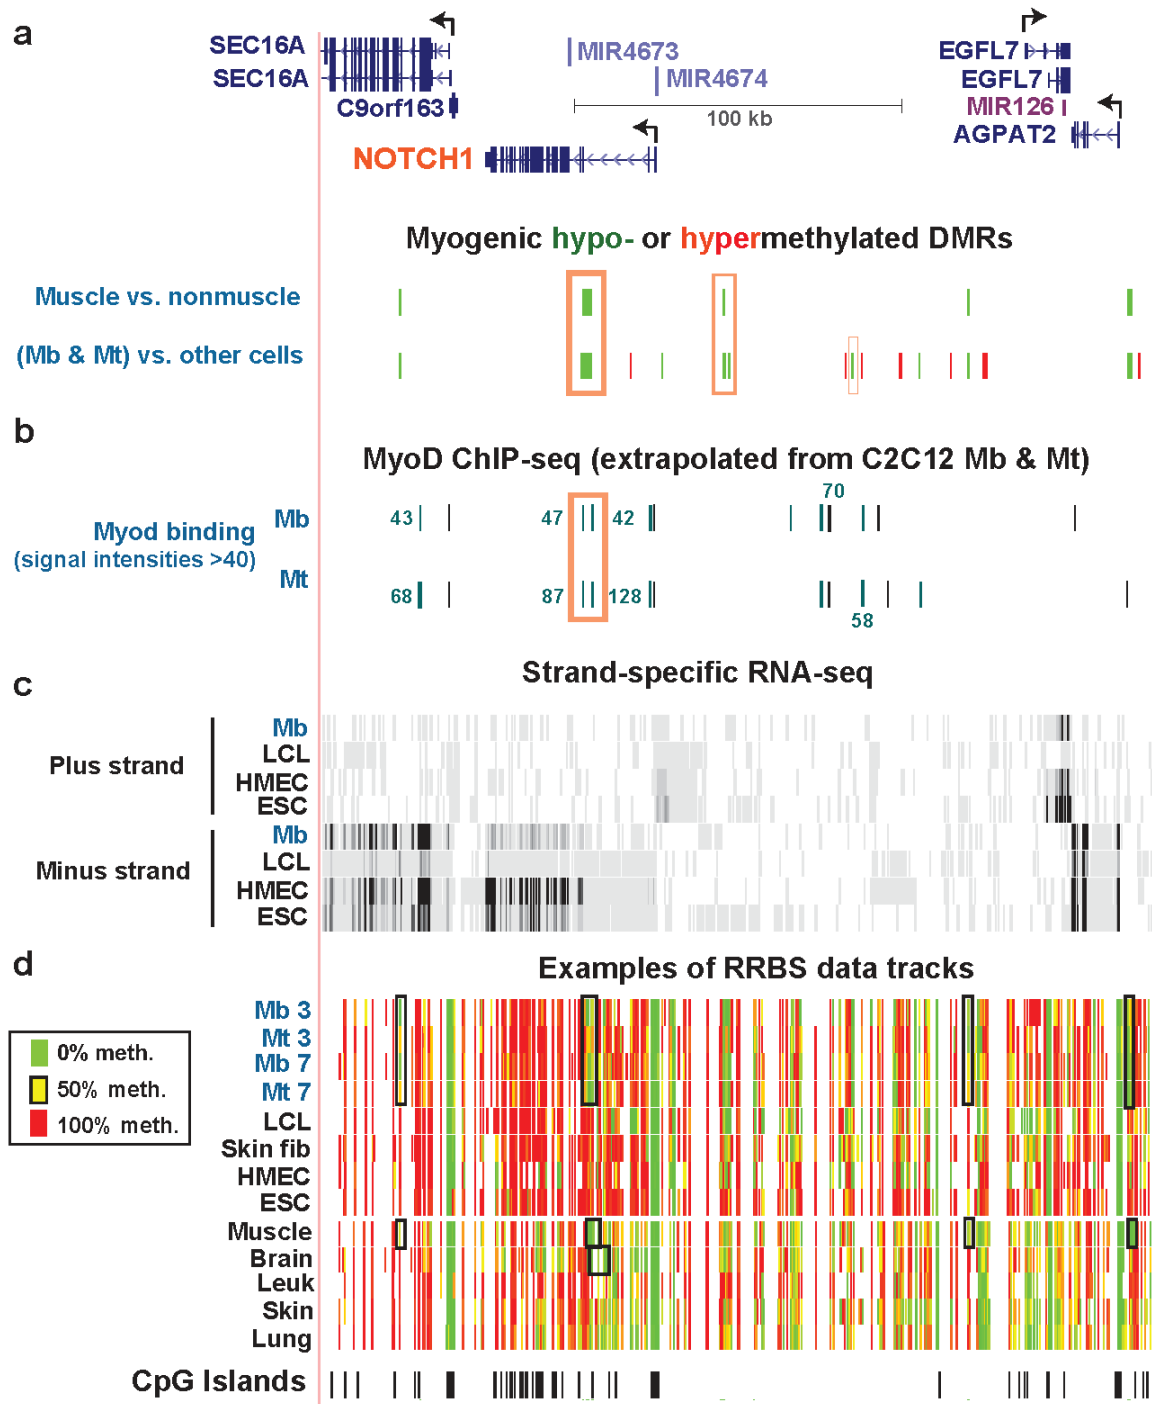

**Figure S3. Myogenic hypomethylated DMRs associated with *NOTCH2* and *LFNG*.** (a) and (b) for the *NOTCH2* and *LFNG* regions, respectively, we display the following tracks: significant myogenic hypo- or hyper-methylated DMRs, chromatin state segmentation, MyoD ChIP-seq, DNaseI-seq, RNA-seq, and one RRBS data track (which indicates the RRBS coverage in these regions). The regions shown are chr1:120,434,525-120,639,399 and chr7:2,482,696-2,576,953 with RNA-seq vertical viewing range at 1-to-200 and 1-to-100, respectively.

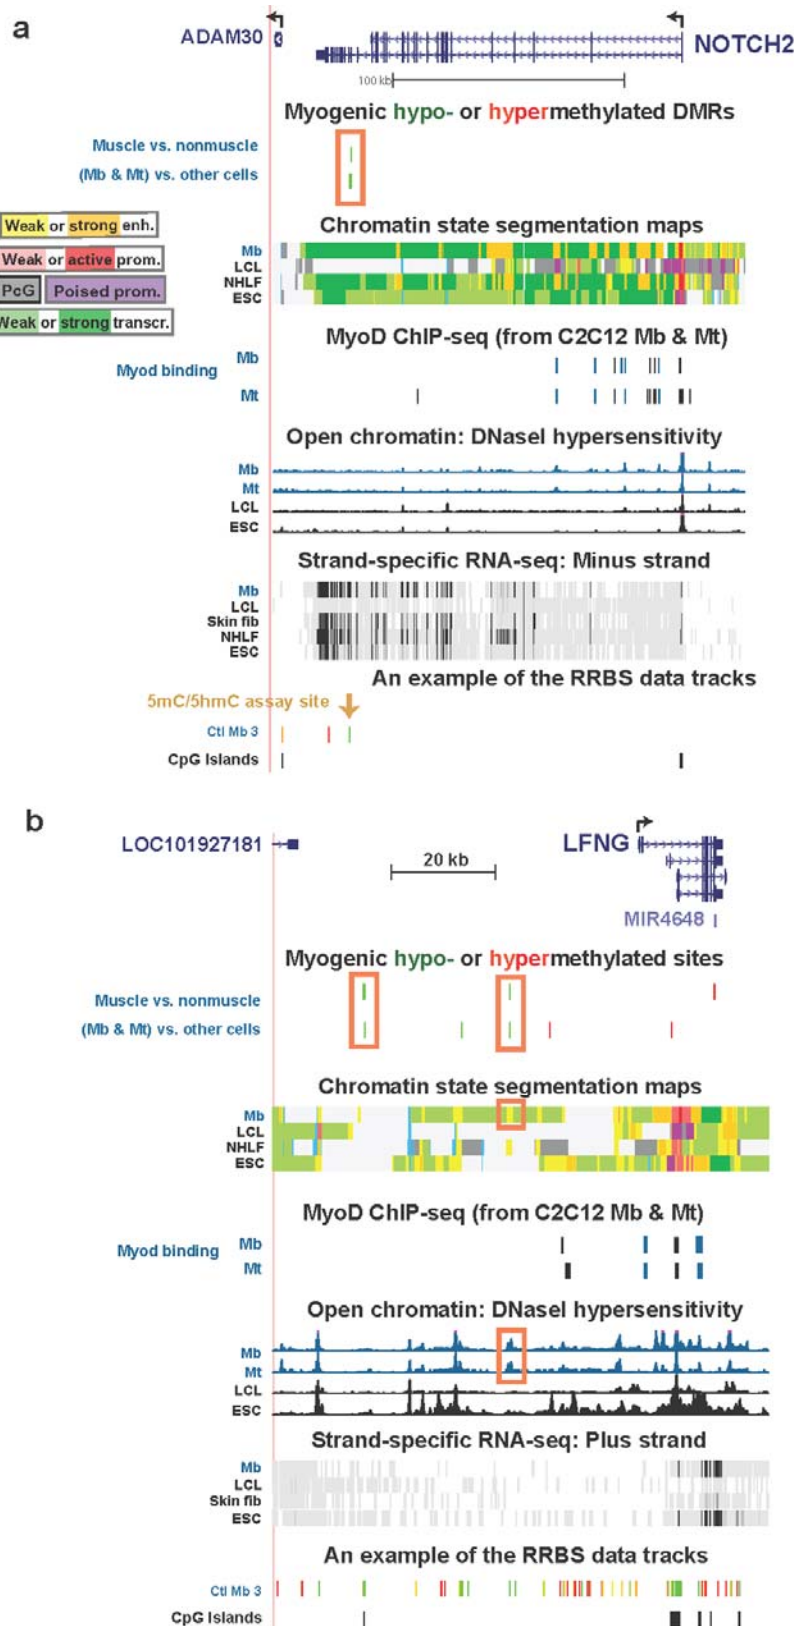

## References

1. Ernst J, Kheradpour P, Mikkelsen TS, Shoresh N, Ward LD, Epstein CB, Zhang X, Wang L, Issner R, Coyne M, et al. Mapping and analysis of chromatin state dynamics in nine human cell types. *Nature* 2011; 473:43-9.
2. Cao Y, Yao Z, Sarkar D, Lawrence M, Sanchez GJ, Parker MH, MacQuarrie KL, Davison J, Morgan MT, Ruzzo WL, et al. Genome-wide MyoD binding in skeletal muscle cells: a potential for broad cellular reprogramming. *Dev Cell* 2010; 18:662-74.
3. Tsumagari K, Baribault C, Terragni J, Varley KE, Gertz J, Pradhan S, Baddoo M, Crain CM, Song L, Crawford GE, et al. Early de novo DNA methylation and prolonged demethylation in the muscle lineage. *Epigenetics* 2013; 8:317-32.
